# Supplementary material
Source: PubMed Central journal article supplement (PMC4767294)
Supplement: NIHMS760975-supplement-01.pdf [file NIHMS760975-supplement-01.pdf]

**Supporting Information for “Polarizable Atomic Multipole Solutes in a Generalized Kirkwood Continuum” by Schnieders and Ponder:**

**Appendix A. Intermediate Terms in the Derivation of the Solvent Field Approximation**

Table A-1. Multipole moment conversions.

---

$$\begin{aligned} Q_0^{(0)} &= q \\ Q_1^{(0)} &= \mu_z \\ Q_1^{(1)} &= \mu_x \\ Q_1^{(-1)} &= \mu_y \\ Q_2^{(0)} &= \Theta_{zz} \\ Q_2^{(1)} &= \frac{2}{\sqrt{3}} \Theta_{xz} \\ Q_2^{(-1)} &= \frac{2}{\sqrt{3}} \Theta_{yz} \\ Q_2^{(2)} &= \frac{1}{\sqrt{3}} (\Theta_{xx} - \Theta_{yy}) \\ Q_2^{(-2)} &= \frac{2}{\sqrt{3}} \Theta_{xy} \end{aligned}$$

---

Table A-2. Unit vacuum potentials.

| l | m  | $\Phi_l^{(m)}(r, \theta, \phi)$                                                                 |
|---|----|-------------------------------------------------------------------------------------------------|
| 0 | 0  | $\frac{1}{r}$                                                                                   |
| 1 | 0  | $\frac{\cos \theta}{r^2}$                                                                       |
|   | 1  | $\frac{\sin \theta \cos \phi}{r^2}$                                                             |
|   | -1 | $\frac{\sin \theta \sin \phi}{r^2}$                                                             |
| 2 | 0  | $\frac{1}{2} \frac{3 \cos^2 \theta - 1}{r^3}$                                                   |
|   | 1  | $\frac{\sqrt{3} \cos \theta \sin \theta \cos \phi}{r^3}$                                        |
|   | -1 | $\frac{\sqrt{3} \cos \theta \sin \theta \sin \phi}{r^3}$                                        |
|   | 2  | $-\frac{\sqrt{3}}{2} \frac{(\sin^2 \theta + 2 \cos^2 \theta \cos^2 \phi - 2 \cos^2 \phi)}{r^3}$ |
|   | -2 | $\frac{\sqrt{3} \sin^2 \theta \sin \phi \cos \phi}{r^3}$                                        |

Table A-3. Unit vacuum fields.

| l | m  | $\mathbf{E}_l^{(m)}$                                                                                                                                                                                                            |
|---|----|---------------------------------------------------------------------------------------------------------------------------------------------------------------------------------------------------------------------------------|
| 0 | 0  | $\frac{1}{r^2} \hat{\mathbf{r}}$                                                                                                                                                                                                |
| 1 | 0  | $\frac{2 \cos \theta}{r^3} \hat{\mathbf{r}} + \frac{\sin \theta}{r^3} \hat{\boldsymbol{\theta}}$                                                                                                                                |
|   | 1  | $\frac{2 \sin \theta \cos \phi}{r^3} \hat{\mathbf{r}} - \frac{\cos \theta \cos \phi}{r^3} \hat{\boldsymbol{\theta}} + \frac{\sin \phi}{r^3} \hat{\boldsymbol{\phi}}$                                                            |
|   | -1 | $\frac{2 \sin \theta \sin \phi}{r^3} \hat{\mathbf{r}} - \frac{\cos \theta \sin \phi}{r^3} \hat{\boldsymbol{\theta}} - \frac{\cos \phi}{r^3} \hat{\boldsymbol{\phi}}$                                                            |
| 2 | 0  | $\frac{3(3 \cos^2 \theta - 1)}{2 r^4} \hat{\mathbf{r}} + \frac{3 \cos \theta \sin \theta}{r^4} \hat{\boldsymbol{\theta}}$                                                                                                       |
|   | 1  | $\frac{3\sqrt{3} \cos \theta \sin \theta \cos \phi}{r^4} \hat{\mathbf{r}} - \frac{\sqrt{3}(2 \cos^2 \theta - 1) \cos \phi}{r^4} \hat{\boldsymbol{\theta}} + \frac{\sqrt{3} \cos \theta \sin \phi}{r^4} \hat{\boldsymbol{\phi}}$ |
|   | -1 | $\frac{3\sqrt{3} \cos \theta \sin \theta \sin \phi}{r^4} \hat{\mathbf{r}} - \frac{\sqrt{3}(2 \cos^2 \theta - 1) \sin \phi}{r^4} \hat{\boldsymbol{\theta}} - \frac{\sqrt{3} \cos \theta \cos \phi}{r^4} \hat{\boldsymbol{\phi}}$ |
|   | 2  | $\frac{3\sqrt{3} \sin^2 \theta \cos 2\phi}{2 r^4} \hat{\mathbf{r}} - \frac{\sqrt{3} \sin \theta \cos \theta \cos 2\phi}{r^4} \hat{\boldsymbol{\theta}} + \frac{\sqrt{3} \sin \theta \sin 2\phi}{r^4} \hat{\boldsymbol{\phi}}$   |
|   | -2 | $\frac{3\sqrt{3} \sin^2 \theta \sin 2\phi}{2 r^4} \hat{\mathbf{r}} - \frac{\sqrt{3} \sin \theta \cos \theta \sin 2\phi}{r^4} \hat{\boldsymbol{\theta}} - \frac{\sqrt{3} \sin \theta \cos 2\phi}{r^4} \hat{\boldsymbol{\phi}}$   |

Table A-4. Selected scalar products of unit magnitude vacuum spherical harmonic fields.

| $(l,m)_1$ | $(l,m)_2$ | $\mathbf{E}_{l_1}^{(m_1)} \cdot \mathbf{E}_{l_2}^{(m_2)}$                                                                              |
|-----------|-----------|----------------------------------------------------------------------------------------------------------------------------------------|
| (0, 0)    | (0, 0)    | $\frac{1}{r^4}$                                                                                                                        |
|           | (1, 0)    | $\frac{2 \cos \theta}{r^5}$                                                                                                            |
|           | (2, 0)    | $\frac{3(3 \cos^2 \theta - 1)}{2 r^6}$                                                                                                 |
| (1, 0)    | (1, 0)    | $\frac{3 \cos^2 \theta + 1}{r^6}$                                                                                                      |
|           | (2, 0)    | $\frac{6 \cos^3 \theta}{r^7}$                                                                                                          |
| (1, 1)    | (1, 1)    | $\frac{(4 \sin^2 \theta + \cos^2 \theta) \cos^2 \phi + \sin^2 \phi}{r^6}$                                                              |
|           | (2, 1)    | $\frac{\sqrt{3} \cos \theta (6 \cos^2 \phi \sin^2 \theta - \cos^2 \phi + 2 \cos^2 \theta \cos^2 \phi + \sin^2 \phi)}{r^7}$             |
| (1,-1)    | (1,-1)    | $\frac{(4 \sin^2 \theta + \cos^2 \theta) \sin^2 \phi + \cos^2 \phi}{r^6}$                                                              |
|           | (2,-1)    | $\frac{\sqrt{3} \cos \theta (6 \sin^2 \phi \sin^2 \theta - \sin^2 \phi + 2 \sin^2 \phi \cos^2 \theta + \cos^2 \phi)}{r^7}$             |
| (2, 0)    | (2, 0)    | $\frac{1}{4} \frac{9 + 81 \cos^4 \theta + (36 \sin^2 \theta - 54) \cos^2 \theta}{r^8}$                                                 |
| (2, 1)    | (2, 1)    | $\frac{12 \cos^2 \phi \cos^4 \theta + ((27 \sin^2 \theta - 12) \cos^2 \phi + 3 \sin^2 \phi) \cos^2 \theta + 3 \cos^2 \phi}{r^8}$       |
| (2,-1)    | (2,-1)    | $\frac{12 \sin^2 \phi \cos^4 \theta + ((27 \sin^2 \theta - 12) \sin^2 \phi + 3 \cos^2 \phi) \cos^2 \theta + 3 \sin^2 \phi}{r^8}$       |
| (2, 2)    | (2, 2)    | $\frac{1}{4} \frac{(27 \cos^4 \theta + 27 + (12 \sin^2 \theta - 54) \cos^2 \theta) \cos^2 2\phi + 12 \sin^2 2\phi \sin^2 \theta}{r^8}$ |
| (2,-2)    | (2,-2)    | $\frac{3 \sin^2 \theta (9 \sin^2 2\phi \sin^2 \theta + 4 \sin^2 2\phi \cos^2 \theta + 4 \cos^2 2\phi)}{4 r^8}$                         |

## Appendix B. Factoring of Generalized Kirkwood Tensors

Cartesian multipole interaction tensors can be computed via recurrence relationships, which can greatly improve the efficiency of their use for high degree expansions.<sup>70,71</sup> Unfortunately, we have not found an analogous approach for generalized Kirkwood tensors. In this appendix we present a practical factoring of the associated algebra that mirrors our implementation of GK, but it is conceivable superior alternatives exist.

The GK auxiliary potential tensor  $\mathbf{A}^{(n)}$  of rank  $n$  has  $3^n$  elements, but because it is totally symmetric only  $(n+1)(n+2)/2$  elements are distinct. For example, the dipole auxiliary potential tensor  $\mathbf{A}^{(1)}$  has 3 elements  $\left(-c_1 \frac{x}{f^3}, -c_1 \frac{y}{f^3}, -c_1 \frac{z}{f^3}\right)$ , where the generalizing function  $f$  was defined in Eq. (6) and  $c_l$  was defined in Eq. (19). In compressed tensor notation<sup>72,73</sup>, elements are denoted as  $\mathbf{A}_{\{n_1, n_2, n_3\}}^{(n)}$ , where  $n_1$ ,  $n_2$ , and  $n_3$  are called degree indices that satisfy the constraint  $n_1 + n_2 + n_3 = n$ . All components of the GK auxiliary potential tensor of any degree can be decomposed as  $\mathbf{A}_{\{n_1, n_2, n_3\}}^{(n)} = x^{n_1} y^{n_2} z^{n_3} t_{(n,0)}$  where  $t_{(n,0)}$  is an entry in the first column of a matrix  $\mathbf{t}$  that we construct purely for convenience, and detail below. Using this notation, one element of the auxiliary dipole potential is  $\mathbf{A}_{\{1,0,0\}}^{(1)} = x t_{(1,0)}$ , where  $t_{(1,0)}$  is  $-c_1 \frac{1}{f^3}$ .

Generation of Cartesian derivatives for any element  $\mathbf{A}_{\{n_1, n_2, n_3\}}^{(n)}$  will now be described. Unlike tensors built from derivatives of  $1/r$ , GK auxiliary potential tensors do not, in general, obey the relationship

$$\frac{\partial A_{\{n_1, n_2, n_3\}}^{(n)}}{\partial x} \neq A_{\{n_1+1, n_2, n_3\}}^{(n+1)}. \quad (\text{B1})$$

However, we present a factoring scheme that facilitates generation of the  $m^{\text{th}}$  order auxiliary potential gradient for any GK auxiliary potential tensor, which we denote as

$$A_{\{n_1, n_2, n_3\}, \{m_1, m_2, m_3\}}^{(n)} = \frac{\partial^m}{\partial x^{m_1} \partial y^{m_2} \partial z^{m_3}} A_{\{n_1, n_2, n_3\}}^{(n)} \quad (\text{B2})$$

where  $m_1 + m_2 + m_3 = m$ . All potential gradients are composed of sums of terms that have the form  $p_1 x^{p_2} y^{p_3} z^{p_4} t_{(i,j)}$ , where  $p_1, p_2, p_3$ , and  $p_4$  are constants. These are enumerated in Table B-1 through Table B-10 for moments through the quadrupole. For example, Table B-2 contains the auxiliary reaction potential  $A_{\{1,0,0\}}^{(1)}$  and its gradients for the x-component of a dipole.

The effective radii chain rule terms are denoted  $\frac{\partial}{\partial a_1} A_{\{n_1, n_2, n_3\}, \{m_1, m_2, m_3\}}^{(n)}$ , where  $a_1$  denotes the derivative is with respect to the effective radii of site 1. They are composed of sums of terms that have the form  $a_2 p_1 x^{p_2} y^{p_3} z^{p_4} b_{(i,j)}$  where  $b_{(i,j)} = \frac{\partial t_{(i,j)}}{\partial a_1} \frac{1}{a_2} = \frac{\partial t_{(i,j)}}{\partial a_2} \frac{1}{a_1}$  is an element from a second matrix  $\mathbf{b}$ , again defined for convenience. This matrix contains the derivatives of the  $\mathbf{t}$  matrix elements with respect to an effective radius, normalized by the effective radius of the other site in the pairwise interaction. The chain rule term with respect to an effective radius for any entry in Table B-1 through Table B-10 is given by substituting the  $\mathbf{t}$  matrix elements with corresponding elements from the  $\mathbf{b}$  matrix and multiplying by the opposite effective radius. For

example, the chain rule term for the first entry in Table B-2 with respect to effective radius 1 is

$$\frac{\partial}{\partial a_1} \mathbf{A}_{\{1,0,0\},\{0,0,0\}}^{(1)} = a_2 x b_{(1,0)} \quad \text{and that for the 2}^{\text{nd}} \text{ entry is } \frac{\partial}{\partial a_1} \mathbf{A}_{\{1,0,0\},\{1,0,0\}}^{(1)} = a_2 \left( b_{(1,0)} + x^2 b_{(1,1)} \right).$$

All that remains is to describe an efficient mechanism to generate all elements of the  $\mathbf{t}$  and  $\mathbf{b}$  matrices. The matrix  $\mathbf{t}$  is of size  $n \times m$ , whose rows and columns are indexed from  $0..n-1$  and  $0..m-1$ , respectively. The first column contains the GK auxiliary reaction potential tensors given in Eq. (35) without factors of  $x$ ,  $y$  or  $z$  in the numerator. All other columns contain derivatives with respect to  $r_\alpha$  of the previous column, where  $\alpha$  represents  $x$ ,  $y$  or  $z$ . The results are normalized by  $r_\alpha$  such that the terms are independent of which derivative was taken.

$$\mathbf{t} = \begin{bmatrix} c_0 \frac{1}{f} & \frac{1}{r_\alpha} \frac{\partial}{\partial r_\alpha} t_{(0,0)} & \cdots & \frac{1}{r_\alpha} \frac{\partial}{\partial r_\alpha} t_{(0,m-2)} \\ -c_1 \frac{1}{f^3} & \frac{1}{r_\alpha} \frac{\partial}{\partial r_\alpha} t_{(1,0)} & \cdots & \frac{1}{r_\alpha} \frac{\partial}{\partial r_\alpha} t_{(1,m-2)} \\ \vdots & \vdots & \ddots & \vdots \\ (-1)^{(n-1)} c_{n-1} \frac{(2(n-1)-1)!!}{f^{2(n-1)+1}} & \frac{1}{r_\alpha} \frac{\partial}{\partial r_\alpha} t_{(n-1,0)} & \cdots & \frac{1}{r_\alpha} \frac{\partial}{\partial r_\alpha} t_{(n-1,m-2)} \end{bmatrix} \quad (\text{B3})$$

We note that all the elements of the 2<sup>nd</sup> column  $t_{(i,1)}$  are related to elements of the first column by a constant factor  $f_1$ ,

$$f_1 = \left( \frac{\partial t_{(i,0)}}{\partial r_\alpha} \right) \frac{1}{r_\alpha t_{(i+1,0)}} = 1 - \frac{e^{-r_y^2/c_f a_1 a_2}}{c_f} \quad (\text{B4})$$

such that all  $t_{(i,1)}$  can be found as

$$t_{(i,1)} = f_1 t_{(i+1,0)} \quad (\text{B5})$$

By the chain rule, all components in the 3<sup>rd</sup> column of  $\mathbf{t}$  are related to those in the first two columns as

$$t_{(i,2)} = f_1 t_{(i+1,1)} + f_2 t_{(i+1,0)} \quad (\text{B6})$$

where  $f_2$  is the derivative of  $f_1$  normalized by  $r_\alpha$

$$f_2 = \left( \frac{\partial f_1}{\partial r_\alpha} \right) \frac{1}{r_\alpha} = \frac{2}{c_f^2 a_1 a_2} e^{-r_{ij}^2 / c_f a_1 a_2} \quad (\text{B7})$$

All higher order (normalized) derivatives  $f_i$  can be determined as

$$f_i = f_r^{i-2} f_2, \quad i \geq 2 \quad (\text{B8})$$

where,

$$f_r = -\frac{2}{c_f a_1 a_2}. \quad (\text{B9})$$

For example,  $f_3$  is the last such term needed for the GK quadrupole-quadrupole energy gradient

$$f_3 = \left( \frac{\partial f_2}{\partial r_\alpha} \right) \frac{1}{r_\alpha} = f_r f_2 \quad (\text{B10})$$

and the final column needed for  $\mathbf{t}$  is

$$t_{(i,3)} = f_1 t_{(i+1,2)} + 2f_2 t_{(i+1,1)} + f_3 t_{(i+1,0)}. \quad (\text{B11})$$

However, for arbitrary order tensors, any entry can be determined from entries in previous columns as a sum





$$b_{(i,1)} = \left( \frac{\partial t_{(i,1)}}{\partial a_1} \right) \frac{1}{a_2} = g_1 t_{(i+1,0)} + f_1 b_{(i+1,0)} \quad (\text{B16})$$

where  $g_i$  is defined as

$$g_1 = \left( \frac{\partial f_1}{\partial a_1} \right) \frac{1}{a_2} = - \frac{r_{ij}^2 e^{-r_{ij}^2/c_f a_1 a_2}}{c_f^2 a_1^2 a_2^2}. \quad (\text{B17})$$

Similarly, the 3<sup>rd</sup> column is

$$b_{(i,2)} = \left( \frac{\partial t_{(i,2)}}{\partial a_1} \right) \frac{1}{a_2} = g_1 t_{(i+1,1)} + g_2 t_{(i+1,0)} + f_1 b_{(i+1,1)} + f_2 b_{(i+1,0)} \quad (\text{B18})$$

where

$$g_2 = \left( \frac{\partial f_2}{\partial a_1} \right) \frac{1}{a_2} = \frac{2e^{-r_{ij}^2/c_f a_1 a_2}}{(c_f a_1 a_2)^2} \left( \frac{r_{ij}^2}{c a_1 a_2} - 1 \right). \quad (\text{B19})$$

All further terms  $g_i$  are determined from  $f_i$  as

$$g_i = \left( \frac{\partial f_i}{\partial a_1} \right) \frac{1}{a_2} = (i-2) f_r^{i-3} g_r f_2 + f_r^{i-2} g_2, \quad i \geq 2 \quad (\text{B20})$$

where

$$g_r = \frac{2}{c_f (a_1 a_2)^2}. \quad (\text{B21})$$

For example,

$$g_3 = g_r f_2 + f_r g_2. \quad (\text{B22})$$

It is now possible to define all elements of the matrix  $\mathbf{b}$ ,

$$b_{(i,j)} = \left( \frac{\partial t_{(i,j)}}{\partial a_1} \right) \frac{1}{a_2} = \sum_{k=1}^j \omega_{j,k} \left( g_k t_{(i+1,j-k)} + f_k b_{(i+1,j-k)} \right) \quad (\text{B23})$$

to facilitate determination of energy gradients for any order multipole interaction.

Table B-1. Gradients of  $A_{\{0,0,0\}}^{(0)}$ .

| $m$   | $\{m\}$ | $A_{\{0,0,0\},\{m_1,m_2,m_3\}}^{(0)}$ |
|-------|---------|---------------------------------------|
| 0     | 0,0,0   | $t_{(0,0)}$                           |
| 1     | 1,0,0   | $xt_{(0,1)}$                          |
|       | 0,1,0   | $yt_{(0,1)}$                          |
|       | 0,0,1   | $zt_{(0,1)}$                          |
| 2     | 2,0,0   | $t_{(0,1)} + x^2t_{(0,2)}$            |
|       | 1,1,0   | $xyt_{(0,2)}$                         |
|       | 1,0,1   | $xzt_{(0,2)}$                         |
|       | 0,2,0   | $t_{(0,1)} + y^2t_{(0,2)}$            |
|       | 0,1,1   | $yzt_{(0,2)}$                         |
|       | 0,0,2   | $t_{(0,1)} + z^2t_{(0,2)}$            |
|       | 3       | 3,0,0                                 |
| 2,1,0 |         | $yt_{(0,2)} + x^2yt_{(0,3)}$          |
| 2,0,1 |         | $zt_{(0,2)} + x^2zt_{(0,3)}$          |
| 1,2,0 |         | $xt_{(0,2)} + xy^2t_{(0,3)}$          |
| 1,1,1 |         | $xyzt_{(0,3)}$                        |
| 1,0,2 |         | $xt_{(0,2)} + xz^2t_{(0,3)}$          |
| 0,3,0 |         | $3yt_{(0,2)} + y^3t_{(0,3)}$          |
| 0,2,1 |         | $zt_{(0,2)} + y^2zt_{(0,3)}$          |
| 0,1,2 |         | $yt_{(0,2)} + yz^2t_{(0,3)}$          |
| 0,0,3 |         | $3zt_{(0,2)} + z^3t_{(0,3)}$          |

Table B-2. Gradients of  $A_{1,0,0}^{(1)}$ .

| $m$ | $\{m\}$ | $A_{\{1,0,0\},\{m_1,m_2,m_3\}}^{(1)}$                       |
|-----|---------|-------------------------------------------------------------|
| 0   | 0,0,0   | $xt_{(1,0)}$                                                |
| 1   | 1,0,0   | $t_{(1,0)} + x^2t_{(1,1)}$                                  |
|     | 0,1,0   | $xyt_{(1,1)}$                                               |
|     | 0,0,1   | $xzt_{(1,1)}$                                               |
| 2   | 2,0,0   | $3xt_{(1,1)} + x^3t_{(1,2)}$                                |
|     | 1,1,0   | $yt_{(1,1)} + x^2yt_{(1,2)}$                                |
|     | 1,0,1   | $zt_{(1,1)} + x^2zt_{(1,2)}$                                |
|     | 0,2,0   | $xt_{(1,1)} + xy^2t_{(1,2)}$                                |
|     | 0,1,1   | $xyzt_{(1,2)}$                                              |
|     | 0,0,2   | $xt_{(1,1)} + xz^2t_{(1,2)}$                                |
| 3   | 3,0,0   | $3t_{(1,1)} + 6x^2t_{(1,2)} + x^4t_{(1,3)}$                 |
|     | 2,1,0   | $3xyt_{(1,2)} + x^3yt_{(1,3)}$                              |
|     | 2,0,1   | $3xzt_{(1,2)} + x^3zt_{(1,3)}$                              |
|     | 1,2,0   | $t_{(1,1)} + x^2t_{(1,2)} + y^2t_{(1,2)} + x^2y^2t_{(1,3)}$ |
|     | 1,1,1   | $yzt_{(1,2)} + x^2yzt_{(1,3)}$                              |
|     | 1,0,2   | $t_{(1,1)} + x^2t_{(1,2)} + z^2t_{(1,2)} + x^2z^2t_{(1,3)}$ |
|     | 0,3,0   | $3xyt_{(1,2)} + xy^3t_{(1,3)}$                              |
|     | 0,2,1   | $xzt_{(1,2)} + xy^2zt_{(1,3)}$                              |
|     | 0,1,2   | $xyt_{(1,2)} + xyz^2t_{(1,3)}$                              |
|     | 0,0,3   | $3xzt_{(1,2)} + xz^3t_{(1,3)}$                              |

Table B-3. Gradients of  $A_{\{0,1,0\}}^{(1)}$ .

| $m$ | $\{m\}$ | $A_{\{0,1,0\},\{m_1,m_2,m_3\}}^{(1)}$                       |
|-----|---------|-------------------------------------------------------------|
| 0   | 0,0,0   | $yt_{(1,0)}$                                                |
| 1   | 1,0,0   | $xyt_{(1,1)}$                                               |
|     | 0,1,0   | $t_{(1,0)} + y^2t_{(1,1)}$                                  |
|     | 0,0,1   | $yzt_{(1,1)}$                                               |
| 2   | 2,0,0   | $yt_{(1,1)} + x^2yt_{(1,2)}$                                |
|     | 1,1,0   | $xt_{(1,1)} + xy^2t_{(1,2)}$                                |
|     | 1,0,1   | $xyzt_{(1,2)}$                                              |
|     | 0,2,0   | $3yt_{(1,1)} + y^3t_{(1,2)}$                                |
|     | 0,1,1   | $zt_{(1,1)} + y^2zt_{(1,2)}$                                |
|     | 0,0,2   | $yt_{(1,1)} + yz^2t_{(1,2)}$                                |
| 3   | 3,0,0   | $3xyt_{(1,2)} + x^3yt_{(1,3)}$                              |
|     | 2,1,0   | $t_{(1,1)} + x^2t_{(1,2)} + y^2t_{(1,2)} + x^2y^2t_{(1,3)}$ |
|     | 2,0,1   | $yzt_{(1,2)} + x^2yzt_{(1,3)}$                              |
|     | 1,2,0   | $3xyt_{(1,2)} + xy^3t_{(1,3)}$                              |
|     | 1,1,1   | $xzt_{(1,2)} + xy^2zt_{(1,3)}$                              |
|     | 1,0,2   | $xyt_{(1,2)} + xyz^2t_{(1,3)}$                              |
|     | 0,3,0   | $3t_{(1,1)} + 6y^2t_{(1,2)} + y^4t_{(1,3)}$                 |
|     | 0,2,1   | $3yzt_{(1,2)} + y^3zt_{(1,3)}$                              |
|     | 0,1,2   | $t_{(1,1)} + y^2t_{(1,2)} + z^2t_{(1,2)} + y^2z^2t_{(1,3)}$ |
|     | 0,0,3   | $3yzt_{(1,2)} + yz^3t_{(1,3)}$                              |

Table B-4. Gradients of  $A_{\{0,0,1\}}^{(1)}$ .

| $m$ | $\{m\}$ | $A_{\{0,0,1\},\{m_1,m_2,m_3\}}^{(1)}$                       |
|-----|---------|-------------------------------------------------------------|
| 0   | 0,0,0   | $zt_{(1,0)}$                                                |
| 1   | 1,0,0   | $xzt_{(1,1)}$                                               |
|     | 0,1,0   | $yzt_{(1,1)}$                                               |
|     | 0,0,1   | $t_{(1,0)} + z^2t_{(1,1)}$                                  |
| 2   | 2,0,0   | $zt_{(1,1)} + x^2zt_{(1,2)}$                                |
|     | 1,1,0   | $xyzt_{(1,2)}$                                              |
|     | 1,0,1   | $xt_{(1,1)} + xz^2t_{(1,2)}$                                |
|     | 0,2,0   | $zt_{(1,1)} + y^2zt_{(1,2)}$                                |
|     | 0,1,1   | $yt_{(1,1)} + yz^2t_{(1,2)}$                                |
|     | 0,0,2   | $3zt_{(1,1)} + z^3t_{(1,2)}$                                |
| 3   | 3,0,0   | $3xzt_{(1,2)} + x^3zt_{(1,3)}$                              |
|     | 2,1,0   | $yzt_{(1,2)} + x^2yzt_{(1,3)}$                              |
|     | 2,0,1   | $t_{(1,1)} + x^2t_{(1,2)} + z^2t_{(1,2)} + x^2z^2t_{(1,3)}$ |
|     | 1,2,0   | $xzt_{(1,2)} + xy^2zt_{(1,3)}$                              |
|     | 1,1,1   | $xyt_{(1,2)} + xyz^2t_{(1,3)}$                              |
|     | 1,0,2   | $3xzt_{(1,2)} + xz^3t_{(1,3)}$                              |
|     | 0,3,0   | $3yzt_{(1,2)} + y^3zt_{(1,3)}$                              |
|     | 0,2,1   | $t_{(1,1)} + y^2t_{(1,2)} + z^2t_{(1,2)} + y^2z^2t_{(1,3)}$ |
|     | 0,1,2   | $3yzt_{(1,2)} + yz^3t_{(1,3)}$                              |
|     | 0,0,3   | $3t_{(1,1)} + 6z^2t_{(1,2)} + z^4t_{(1,3)}$                 |

Table B-5. Gradients of  $A_{\{2,0,0\}}^{(2)}$ .

| $m$ | $\{m\}$ | $A_{\{2,0,0\},\{m_1,m_2,m_3\}}^{(2)}$                               |
|-----|---------|---------------------------------------------------------------------|
| 0   | 0,0,0   | $x^2 t_{(2,0)}$                                                     |
| 1   | 1,0,0   | $2xt_{(2,0)} + x^3 t_{(2,1)}$                                       |
|     | 0,1,0   | $x^2 yt_{(2,1)}$                                                    |
|     | 0,0,1   | $x^2 zt_{(2,1)}$                                                    |
| 2   | 2,0,0   | $2t_{(2,0)} + 5x^2 t_{(2,1)} + x^4 t_{(2,2)}$                       |
|     | 1,1,0   | $2xyt_{(2,1)} + x^3 yt_{(2,2)}$                                     |
|     | 1,0,1   | $2xzt_{(2,1)} + x^3 zt_{(2,2)}$                                     |
|     | 0,2,0   | $x^2 t_{(2,1)} + x^2 y^2 t_{(2,2)}$                                 |
|     | 0,1,1   | $x^2 yzt_{(2,2)}$                                                   |
|     | 0,0,2   | $x^2 t_{(2,1)} + x^2 z^2 t_{(2,2)}$                                 |
| 3   | 3,0,0   | $12xt_{(2,1)} + 9x^3 t_{(2,2)} + x^5 t_{(2,3)}$                     |
|     | 2,1,0   | $2yt_{(2,1)} + 5x^2 yt_{(2,2)} + x^4 yt_{(2,3)}$                    |
|     | 2,0,1   | $2zt_{(2,1)} + 5x^2 zt_{(2,2)} + x^4 zt_{(2,3)}$                    |
|     | 1,2,0   | $2xt_{(2,1)} + x^3 t_{(2,2)} + 2xy^2 t_{(2,2)} + x^3 y^2 t_{(2,3)}$ |
|     | 1,1,1   | $2xyz t_{(2,2)} + x^3 yz t_{(2,3)}$                                 |
|     | 1,0,2   | $2xt_{(2,1)} + x^3 t_{(2,2)} + 2xz^2 t_{(2,2)} + x^3 z^2 t_{(2,3)}$ |
|     | 0,3,0   | $3x^2 yt_{(2,2)} + x^2 y^3 t_{(2,3)}$                               |
|     | 0,2,1   | $x^2 zt_{(2,2)} + x^2 y^2 zt_{(2,3)}$                               |
|     | 0,1,2   | $yx^2 t_{(2,2)} + x^2 yz^2 t_{(2,3)}$                               |
|     | 0,0,3   | $3x^2 zt_{(2,2)} + x^2 z^3 t_{(2,3)}$                               |



Table B-6. Gradients of  $A_{\{1,1,0\}}^{(2)}$ .

| $m$ | $\{m\}$ | $A_{\{1,1,0\},\{m_1,m_2,m_3\}}^{(2)}$                           |
|-----|---------|-----------------------------------------------------------------|
| 0   | 0,0,0   | $xyt_{(2,0)}$                                                   |
| 1   | 1,0,0   | $yt_{(2,0)} + x^2yt_{(2,1)}$                                    |
|     | 0,1,0   | $xt_{(2,0)} + xy^2t_{(2,1)}$                                    |
|     | 0,0,1   | $xyzt_{(2,1)}$                                                  |
| 2   | 2,0,0   | $3xyt_{(2,1)} + x^3yt_{(2,2)}$                                  |
|     | 1,1,0   | $t_{(2,0)} + x^2t_{(2,1)} + y^2t_{(2,1)} + x^2y^2t_{(2,2)}$     |
|     | 1,0,1   | $yzt_{(2,1)} + x^2yzt_{(2,2)}$                                  |
|     | 0,2,0   | $3xyt_{(2,1)} + xy^3t_{(2,2)}$                                  |
|     | 0,1,1   | $xzt_{(2,1)} + xy^2zt_{(2,2)}$                                  |
|     | 0,0,2   | $xyt_{(2,1)} + xyz^2t_{(2,2)}$                                  |
| 3   | 3,0,0   | $3yt_{(2,1)} + 6x^2yt_{(2,2)} + x^4yt_{(2,3)}$                  |
|     | 2,1,0   | $3xt_{(2,1)} + 3xy^2t_{(2,2)} + x^3t_{(2,2)} + x^3y^2t_{(2,3)}$ |
|     | 2,0,1   | $3xyzt_{(2,2)} + x^3yzt_{(2,3)}$                                |
|     | 1,2,0   | $3yt_{(2,1)} + 3x^2yt_{(2,2)} + y^3t_{(2,2)} + x^2y^3t_{(2,3)}$ |
|     | 1,1,1   | $zt_{(2,1)} + x^2zt_{(2,2)} + y^2zt_{(2,2)} + x^2y^2zt_{(2,3)}$ |
|     | 1,0,2   | $yt_{(2,1)} + x^2yt_{(2,2)} + yz^2t_{(2,2)} + x^2yz^2t_{(2,3)}$ |
|     | 0,3,0   | $3xt_{(2,1)} + 6xy^2t_{(2,2)} + xy^4t_{(2,3)}$                  |
|     | 0,2,1   | $3xyzt_{(2,2)} + xy^3zt_{(2,3)}$                                |
|     | 0,1,2   | $xt_{(2,1)} + xy^2t_{(2,2)} + xz^2t_{(2,2)} + xy^2z^2t_{(2,3)}$ |
|     | 0,0,3   | $3xyzt_{(2,2)} + xyz^3t_{(2,3)}$                                |

Table B-7. Gradients of  $A_{\{1,0,1\}}^{(2)}$ .

| $m$ | $\{m\}$ | $A_{\{1,0,1\},\{m_1,m_2,m_3\}}^{(2)}$                           |
|-----|---------|-----------------------------------------------------------------|
| 0   | 0,0,0   | $xzt_{(2,0)}$                                                   |
| 1   | 1,0,0   | $zt_{(2,0)} + x^2zt_{(2,1)}$                                    |
|     | 0,1,0   | $xyzt_{(2,1)}$                                                  |
|     | 0,0,1   | $xt_{(2,0)} + xz^2t_{(2,1)}$                                    |
| 2   | 2,0,0   | $3xzt_{(2,1)} + x^3zt_{(2,2)}$                                  |
|     | 1,1,0   | $yzt_{(2,1)} + x^2yzt_{(2,2)}$                                  |
|     | 1,0,1   | $t_{(2,0)} + x^2t_{(2,1)} + z^2t_{(2,1)} + x^2z^2t_{(2,2)}$     |
|     | 0,2,0   | $xzt_{(2,1)} + xy^2zt_{(2,2)}$                                  |
|     | 0,1,1   | $xyt_{(2,1)} + xyz^2t_{(2,2)}$                                  |
|     | 0,0,2   | $3xzt_{(2,1)} + xz^3t_{(2,2)}$                                  |
| 3   | 3,0,0   | $3zt_{(2,1)} + 6x^2zt_{(2,2)} + x^4zt_{(2,3)}$                  |
|     | 2,1,0   | $3xyzt_{(2,2)} + x^3yzt_{(2,3)}$                                |
|     | 2,0,1   | $3xt_{(2,1)} + 3xz^2t_{(2,2)} + x^3t_{(2,2)} + x^3z^2t_{(2,3)}$ |
|     | 1,2,0   | $zt_{(2,1)} + x^2zt_{(2,2)} + y^2zt_{(2,2)} + x^2y^2zt_{(2,3)}$ |
|     | 1,1,1   | $yt_{(2,1)} + x^2yt_{(2,2)} + yz^2t_{(2,2)} + x^2yz^2t_{(2,3)}$ |
|     | 1,0,2   | $3zt_{(2,1)} + 3x^2zt_{(2,2)} + z^3t_{(2,2)} + x^2z^3t_{(2,3)}$ |
|     | 0,3,0   | $3xyzt_{(2,2)} + xy^3zt_{(2,3)}$                                |
|     | 0,2,1   | $xt_{(2,1)} + xy^2t_{(2,2)} + xz^2t_{(2,2)} + xy^2z^2t_{(2,3)}$ |
|     | 0,1,2   | $3xyzt_{(2,2)} + xyz^3t_{(2,3)}$                                |
|     | 0,0,3   | $3xt_{(2,1)} + 6xz^2t_{(2,2)} + xz^4t_{(2,3)}$                  |

Table B-8. Gradients of  $A_{\{0,2,0\}}^{(2)}$ .

| $m$ | $\{m\}$ | $A_{\{0,2,0\},\{m_1,m_2,m_3\}}^{(2)}$                               |
|-----|---------|---------------------------------------------------------------------|
| 0   | 0,0,0   | $y^2 t_{(2,0)}$                                                     |
| 1   | 1,0,0   | $xy^2 t_{(2,1)}$                                                    |
|     | 0,1,0   | $2yt_{(2,0)} + y^3 t_{(2,1)}$                                       |
|     | 0,0,1   | $y^2 zt_{(2,1)}$                                                    |
| 2   | 2,0,0   | $y^2 t_{(2,1)} + x^2 y^2 t_{(2,2)}$                                 |
|     | 1,1,0   | $2xyt_{(2,1)} + xy^3 t_{(2,2)}$                                     |
|     | 1,0,1   | $xy^2 zt_{(2,2)}$                                                   |
|     | 0,2,0   | $2t_{(2,0)} + 5y^2 t_{(2,1)} + y^4 t_{(2,2)}$                       |
|     | 0,1,1   | $2yzt_{(2,1)} + y^3 zt_{(2,2)}$                                     |
|     | 0,0,2   | $y^2 t_{(2,1)} + y^2 z^2 t_{(2,2)}$                                 |
| 3   | 3,0,0   | $3xy^2 t_{(2,2)} + x^3 y^2 t_{(2,3)}$                               |
|     | 2,1,0   | $2yt_{(2,1)} + y^3 t_{(2,2)} + 2x^2 yt_{(2,2)} + x^2 y^3 t_{(2,3)}$ |
|     | 2,0,1   | $y^2 zt_{(2,2)} + x^2 y^2 zt_{(2,3)}$                               |
|     | 1,2,0   | $2xt_{(2,1)} + 5xy^2 t_{(2,2)} + xy^4 t_{(2,3)}$                    |
|     | 1,1,1   | $2xyz t_{(2,2)} + xy^3 zt_{(2,3)}$                                  |
|     | 1,0,2   | $xy^2 t_{(2,2)} + xy^2 z^2 t_{(2,3)}$                               |
|     | 0,3,0   | $12yt_{(2,1)} + 9y^3 t_{(2,2)} + y^5 t_{(2,3)}$                     |
|     | 0,2,1   | $2zt_{(2,1)} + 5y^2 zt_{(2,2)} + y^4 zt_{(2,3)}$                    |
|     | 0,1,2   | $2yt_{(2,1)} + y^3 t_{(2,2)} + 2yz^2 t_{(2,2)} + y^3 z^2 t_{(2,3)}$ |
|     | 0,0,3   | $3y^2 zt_{(2,2)} + y^2 z^3 t_{(2,3)}$                               |

Table B-9. Gradients of  $A_{\{0,1,1\}}^{(2)}$ .

| $m$ | $\{m\}$ | $A_{\{0,1,1\},\{m_1,m_2,m_3\}}^{(2)}$                           |
|-----|---------|-----------------------------------------------------------------|
| 0   | 0,0,0   | $yzt_{(2,0)}$                                                   |
| 1   | 1,0,0   | $xyzt_{(2,1)}$                                                  |
|     | 0,1,0   | $zt_{(2,0)} + y^2zt_{(2,1)}$                                    |
|     | 0,0,1   | $yt_{(2,0)} + yz^2t_{(2,1)}$                                    |
| 2   | 2,0,0   | $yzt_{(2,1)} + x^2yzt_{(2,2)}$                                  |
|     | 1,1,0   | $xzt_{(2,1)} + xy^2zt_{(2,2)}$                                  |
|     | 1,0,1   | $xyt_{(2,1)} + xyz^2t_{(2,2)}$                                  |
|     | 0,2,0   | $3yzt_{(2,1)} + y^3zt_{(2,2)}$                                  |
|     | 0,1,1   | $t_{(2,0)} + z^2t_{(2,1)} + y^2t_{(2,1)} + y^2z^2t_{(2,2)}$     |
|     | 0,0,2   | $3yzt_{(2,1)} + yz^3t_{(2,2)}$                                  |
| 3   | 3,0,0   | $3xyzt_{(2,2)} + x^3yzt_{(2,3)}$                                |
|     | 2,1,0   | $zt_{(2,1)} + y^2zt_{(2,2)} + x^2zt_{(2,2)} + x^2y^2zt_{(2,3)}$ |
|     | 2,0,1   | $yt_{(2,1)} + x^2yt_{(2,2)} + yz^2t_{(2,2)} + x^2yz^2t_{(2,3)}$ |
|     | 1,2,0   | $3xyzt_{(2,2)} + xy^3zt_{(2,3)}$                                |
|     | 1,1,1   | $xt_{(2,1)} + xy^2t_{(2,2)} + xz^2t_{(2,2)} + xy^2z^2t_{(2,3)}$ |
|     | 1,0,2   | $3xyzt_{(2,2)} + xyz^3t_{(2,3)}$                                |
|     | 0,3,0   | $3zt_{(2,1)} + 6y^2zt_{(2,2)} + y^4zt_{(2,3)}$                  |
|     | 0,2,1   | $3yt_{(2,1)} + 3yz^2t_{(2,2)} + y^3t_{(2,2)} + y^3z^2t_{(2,3)}$ |
|     | 0,1,2   | $3zt_{(2,1)} + 3y^2zt_{(2,2)} + z^3t_{(2,2)} + y^2z^3t_{(2,3)}$ |
|     | 0,0,3   | $3yt_{(2,1)} + 6yz^2t_{(2,2)} + yz^4t_{(2,3)}$                  |

Table B-10. Gradients of  $A_{\{0,0,2\}}^{(2)}$ .

| $m$ | $\{m\}$ | $A_{\{0,0,2\},\{m_1,m_2,m_3\}}^{(2)}$                               |
|-----|---------|---------------------------------------------------------------------|
| 0   | 0,0,0   | $z^2 t_{(2,0)}$                                                     |
| 1   | 1,0,0   | $xz^2 t_{(2,1)}$                                                    |
|     | 0,1,0   | $yz^2 t_{(2,1)}$                                                    |
|     | 0,0,1   | $2zt_{(2,0)} + z^3 t_{(2,1)}$                                       |
| 2   | 2,0,0   | $z^2 t_{(2,1)} + x^2 z^2 t_{(2,2)}$                                 |
|     | 1,1,0   | $xyz^2 t_{(2,2)}$                                                   |
|     | 1,0,1   | $2xzt_{(2,1)} + xz^3 t_{(2,2)}$                                     |
|     | 0,2,0   | $z^2 t_{(2,1)} + y^2 z^2 t_{(2,2)}$                                 |
|     | 0,1,1   | $2yzt_{(2,1)} + yz^3 t_{(2,2)}$                                     |
|     | 0,0,2   | $2t_{(2,0)} + 5z^2 t_{(2,1)} + z^4 t_{(2,2)}$                       |
| 3   | 3,0,0   | $3xz^2 t_{(2,2)} + x^3 z^2 t_{(2,3)}$                               |
|     | 2,1,0   | $yz^2 t_{(2,2)} + x^2 yz^2 t_{(2,3)}$                               |
|     | 2,0,1   | $2zt_{(2,1)} + z^3 t_{(2,2)} + 2x^2 zt_{(2,2)} + x^2 z^3 t_{(2,3)}$ |
|     | 1,2,0   | $xz^2 t_{(2,2)} + xy^2 z^2 t_{(2,3)}$                               |
|     | 1,1,1   | $2xyzt_{(2,2)} + xyz^3 t_{(2,3)}$                                   |
|     | 1,0,2   | $2xt_{(2,1)} + 5xz^2 t_{(2,2)} + xz^4 t_{(2,3)}$                    |
|     | 0,3,0   | $3yz^2 t_{(2,2)} + y^3 z^2 t_{(2,3)}$                               |
|     | 0,2,1   | $2zt_{(2,1)} + z^3 t_{(2,2)} + 2y^2 zt_{(2,2)} + y^2 z^3 t_{(2,3)}$ |
|     | 0,1,2   | $2yt_{(2,1)} + 5yz^2 t_{(2,2)} + yz^4 t_{(2,3)}$                    |
|     | 0,0,3   | $12zt_{(2,1)} + 9z^3 t_{(2,2)} + z^5 t_{(2,3)}$                     |
